# Supplementary material for: Downregulation of circ-RANBP9 in laryngeal cancer and its clinical significance
Source: PubMed Central journal article supplement — Ann Transl Med. 2021 Mar;9(6):484. doi: 10.21037/atm-21-567 (PMC8039645; doi:10.21037/atm-21-567), 2021-03
Supplement: atm-09-06-484-rc.pdf [file atm-09-06-484-rc.pdf]

## **Materials Design Analysis Reporting (MDAR) Checklist for Authors**

The MDAR framework establishes a minimum set of requirements in transparent reporting applicable to studies in the life sciences (see Statement of Task: [doi:10.31222/osf.io/9sm4x](https://doi.org/10.31222/osf.io/9sm4x)). The MDAR checklist is a tool for authors, editors and others seeking to adopt the MDAR framework for transparent reporting in manuscripts and other outputs. Please refer to the MDAR Elaboration Document for additional context for the MDAR framework.

**Materials**

|                                                                                                                                                                                                         |                                                                                          |            |
|---------------------------------------------------------------------------------------------------------------------------------------------------------------------------------------------------------|------------------------------------------------------------------------------------------|------------|
| <b>Antibodies</b>                                                                                                                                                                                       | <b>Yes (indicate where provided:section/paragraph)</b>                                   | <b>n/a</b> |
| For commercial reagents, provide supplier name, catalogue number and RRID, if available.                                                                                                                | In the methods section, western blotting part (Page 6 line 191-198; page 7 line 199-202) |            |
| <b>Cell materials</b>                                                                                                                                                                                   | <b>Yes (indicate where provided:section/paragraph)</b>                                   | <b>n/a</b> |
| <b>Cell lines:</b> Provide species information, strain. Provide accession number in repository <b>OR</b> supplier name, catalog number, clone number, <b>OR</b> RRID                                    | In the methods section, cell culture part (Page 5 line 145-148)                          |            |
| <b>Primary cultures:</b> Provide species, strain, sex of origin, genetic modification status.                                                                                                           | The cells used in our study were not primary cultures.                                   | <b>n/a</b> |
| <b>Experimental animals</b>                                                                                                                                                                             | <b>Yes (indicate where provided:section/paragraph)</b>                                   | <b>n/a</b> |
| <b>Laboratory animals:</b> Provide species, strain, sex, age, genetic modification status. Provide accession number in repository <b>OR</b> supplier name, catalog number, clone number, <b>OR</b> RRID | My study did not involve laboratory animals.                                             | n/a        |
| <b>Animal observed in or captured from the field:</b> Provide species, sex and age where possible                                                                                                       | My study did not involve laboratory animals.                                             | n/a        |
| <b>Model organisms:</b> Provide Accession number in repository (where relevant) <b>OR</b> RRID                                                                                                          | My study did not involve laboratory animals.                                             | n/a        |
| <b>Plants and microbes</b>                                                                                                                                                                              | <b>Yes (indicate where provided: section/paragraph)</b>                                  | <b>n/a</b> |
| <b>Plants:</b> provide species and strain, unique accession number if available, and source (including location for collected wild specimens)                                                           | My study did not involve plants.                                                         | n/a        |
| <b>Microbes:</b> provide species and strain, unique accession number if available, and source                                                                                                           | My study did not involve microbes                                                        | n/a        |
| <b>Human research participants</b>                                                                                                                                                                      | <b>Yes (indicate where provided:section/paragraph)</b>                                   | <b>n/a</b> |
| Identify authority granting ethics approval(IRB or equivalent committee(s), provide reference number for approval.                                                                                      | In the methods section, patients and specimens part (Page 5 line 139-141).               |            |
| Provide statement confirming informed consent obtained from study participants.                                                                                                                         | In the methods section, patients and specimens part (Page 5 line 139-140).               |            |
| Report on age and sex for all study participants.                                                                                                                                                       | In the table 2(Page 26 and 27).                                                          |            |

**Design**

|                                                                                                                                                                     |                                                                      |            |
|---------------------------------------------------------------------------------------------------------------------------------------------------------------------|----------------------------------------------------------------------|------------|
| <b>Study protocol</b>                                                                                                                                               | <b>Yes (indicate where provided:section/paragraph)</b>               | <b>n/a</b> |
| For clinical trials, provide the trial registration number OR cite DOI in manuscript.                                                                               | Our study did not involve clinical trials.                           | n/a        |
| <b>Laboratory protocol</b>                                                                                                                                          | <b>Yes (indicate where provided:section/paragraph)</b>               | <b>n/a</b> |
| Provide DOI or other citation details if detailed step-by-step protocols are available.                                                                             | In the methods section (Page 6 to page 7).                           |            |
| <b>Experimental study design (statistics details)</b>                                                                                                               | <b>Yes (indicate where provided:section/paragraph)</b>               | <b>n/a</b> |
| State whether and how the following have been done, or if they were not carried out.                                                                                |                                                                      |            |
| Sample size determination                                                                                                                                           | In the methods section, patients and specimens (Page 4 line 132)     |            |
| Randomisation                                                                                                                                                       | Our study did not involve clinical trials.                           | n/a        |
| Blinding                                                                                                                                                            | Our study did not involve clinical trials.                           | n/a        |
| Inclusion/exclusion criteria                                                                                                                                        | In the methods section, patients and specimens (Page 5 line 137-141) |            |
| <b>Sample definition and in-laboratory replication</b>                                                                                                              | <b>Yes (indicate where provided:section/paragraph)</b>               | <b>n/a</b> |
| State number of times the experiment was replicated in laboratory                                                                                                   | In the figure legends.                                               |            |
| Define whether data describe technical or biological replicates                                                                                                     | In the figure legends.                                               |            |
| <b>Ethics</b>                                                                                                                                                       | <b>Yes (indicate where provided: section/paragraph)</b>              | <b>n/a</b> |
| Studies involving human participants: State details of authority granting ethics approval (IRB or equivalent committee(s), provide reference number for approval.   | In the methods section, patients and specimens (Page 5 line 141-145) |            |
| Studies involving experimental animals: State details of authority granting ethics approval (IRB or equivalent committee(s), provide reference number for approval. | Our study did not involve laboratory animals.                        |            |
| Studies involving specimen and field samples: State if relevant permits obtained, provide details of authority approving study; if none were required, explain why. | In the methods section, patients and specimens (Page 5 line 144-145) |            |
| <b>Dual Use Research of Concern (DURC)</b>                                                                                                                          | <b>Yes (indicate where provided:section/paragraph)</b>               | <b>n/a</b> |
| If study is subject to dual use research of concern, state the authority granting approval and reference number for the regulatory approval                         | Our study did not involve dual use research.                         | n/a        |

## Analysis

| <b>Attrition</b>                                                                                                                              | <b>Yes (indicate where provided:section/paragraph)</b>                  | <b>n/a</b> |
|-----------------------------------------------------------------------------------------------------------------------------------------------|-------------------------------------------------------------------------|------------|
| State if sample or data point from the analysis is excluded, and whether the criteria for exclusion were determined and specified in advance. | In the methods section, patients and specimens (Page 5 line 137-141)    |            |
| <b>Statistics</b>                                                                                                                             | <b>Yes (indicate where provided:section/paragraph)</b>                  | <b>n/a</b> |
| Describe statistical tests used and justify choice of tests.                                                                                  | In the methods section, Statistical analysis part(Page 9 line 270-275)  |            |
| <b>Data Availability</b>                                                                                                                      | <b>Yes (indicate where provided:section/paragraph)</b>                  | <b>n/a</b> |
| State whether newly created datasets are available, including protocols for access or restriction on access.                                  | In the Data-Sharing-Statement.                                          |            |
| If data are publicly available, provide accession number in repository or DOI or URL.                                                         | In the footnote section (Page 15 line 490-495).                         |            |
| If publicly available data are reused, provide accession number in repository or DOI or URL, where possible.                                  | In the methods section, Bioinformatics analysis (Page 8,9 line 259-268) |            |
| <b>Code Availability</b>                                                                                                                      | <b>Yes (indicate where provided:section/paragraph)</b>                  | <b>n/a</b> |
| For all newly generated code and software essential for replicating the main findings of the study:                                           |                                                                         |            |
| State whether the code or software is available.                                                                                              | In the methods section, Bioinformatics analysis (Page 8,9 line 259-268) |            |
| If code is publicly available, provide accession number in repository, or DOI or URL.                                                         | Sorry, now this content is not convenient to be supplied.               | n/a        |

## Reporting

| <b>Adherence to community standards</b>                                                                                                                                                                                                  | <b>Yes (indicate where provided: section/paragraph)</b>                                       | <b>n/a</b> |
|------------------------------------------------------------------------------------------------------------------------------------------------------------------------------------------------------------------------------------------|-----------------------------------------------------------------------------------------------|------------|
| MDAR framework recommends adoption of discipline-specific guidelines, established and endorsed through community initiatives. Journals have their own policy about requiring specific guidelines and recommendations to complement MDAR. |                                                                                               |            |
| State if relevant guidelines (eg., ICMJE, MIBBI, ARRIVE) have been followed, and whether a checklist (eg., CONSORT, PRISMA, ARRIVE) is provided with the manuscript.                                                                     | ICMJE guidelines were followed, as the journal follows ICMJE recommendations for publication. |            |

Article information: <http://dx.doi.org/10.21037/atm-21-567>
