# Supplementary material for: Downregulation of circ-RANBP9 in laryngeal cancer and its clinical significance
Source: PubMed Central journal article supplement — Ann Transl Med. 2021 Mar;9(6):484. doi: 10.21037/atm-21-567 (PMC8039645; doi:10.21037/atm-21-567), 2021-03
Supplement: atm-09-06-484-supplementary.pdf [file atm-09-06-484-supplementary.pdf]

**Table S1** siRNA sequence against circ-RANBP9

| SiRNA            | Sequence (5'-3')      |
|------------------|-----------------------|
| Circ-RANBP9 si-1 | CCGCACAUUUUUCAGCCAAAU |
| Circ-RANBP9 si-2 | AUUUUUCAGCCAAAUUGUAU  |
| Circ-RANBP9 si-3 | UUCAGCCAAAUUGUAUCCUA  |
| NC               | UUCUCCGAACGUGUCACGUTT |
|                  | ACGUGACACGUUCGGAGAATT |
